# Supplementary material
Source: PubMed Central journal article supplement (PMC3187183)

Spleen & Lymph Nodes

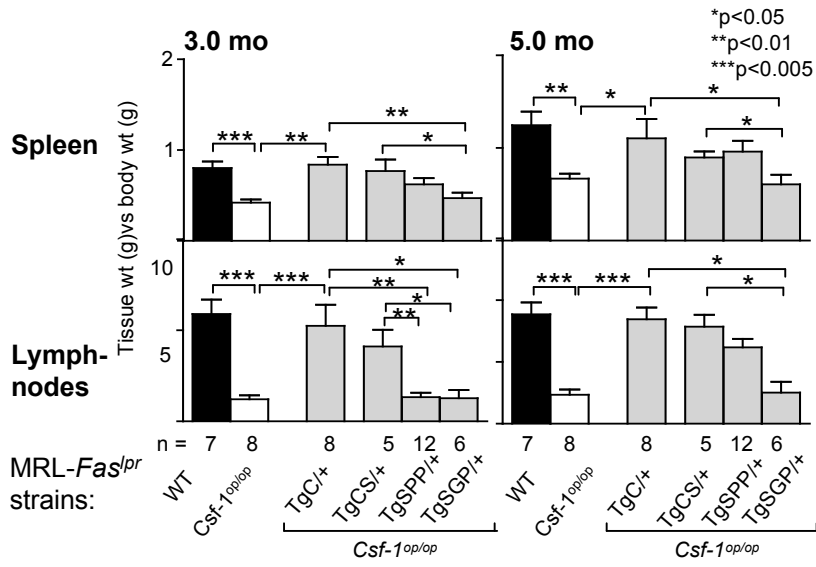

Intra-renal Leukocytes

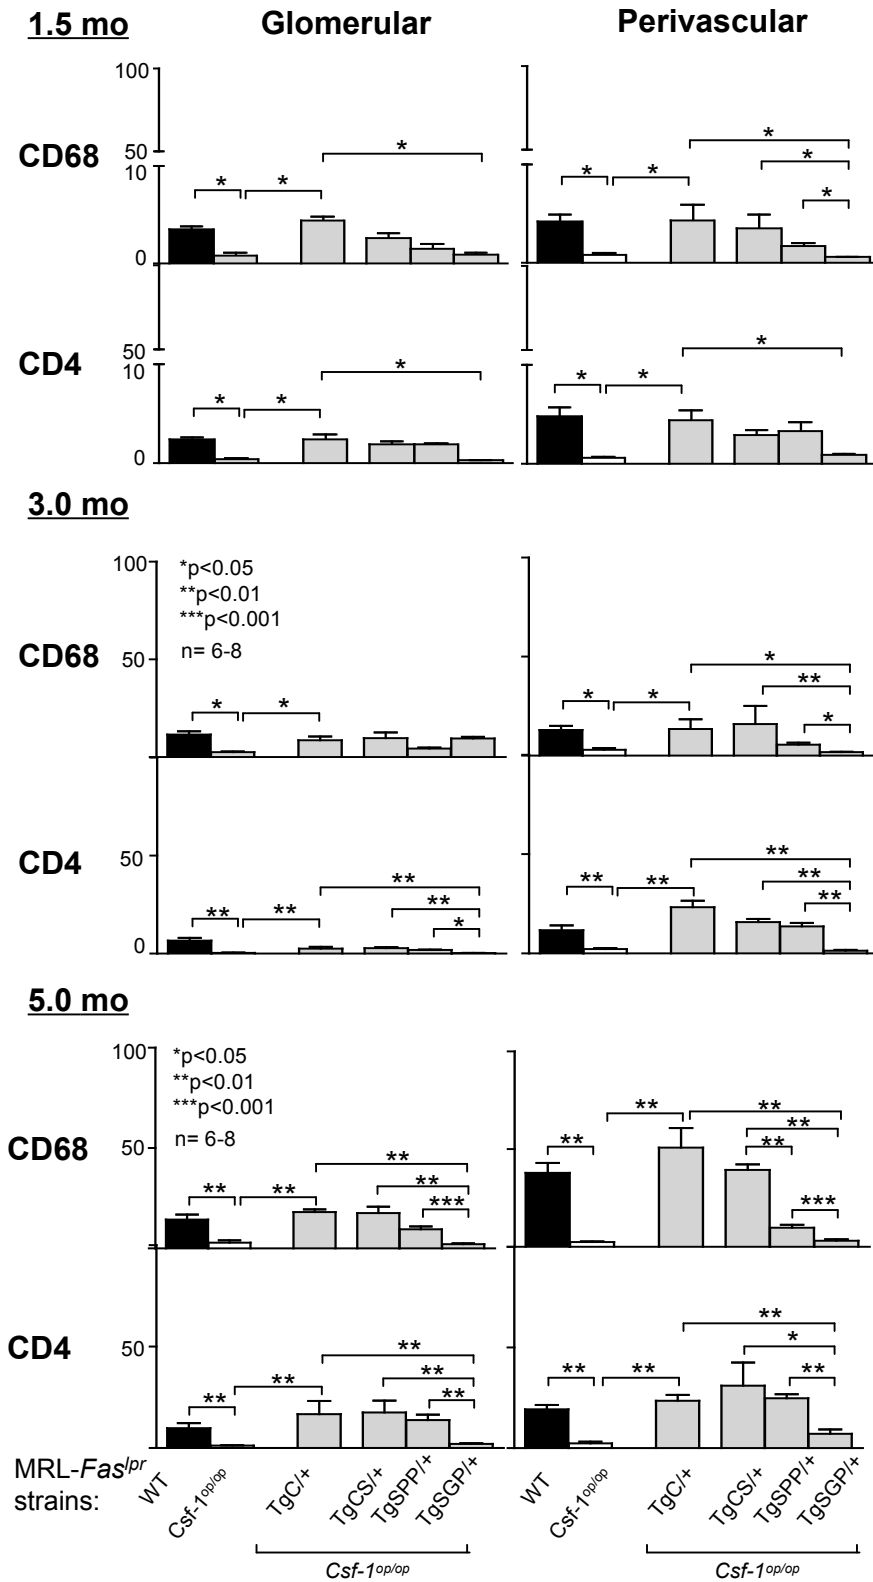

Intra-renal Mø (CD68<sup>+</sup>) in Cortex versus Medulla

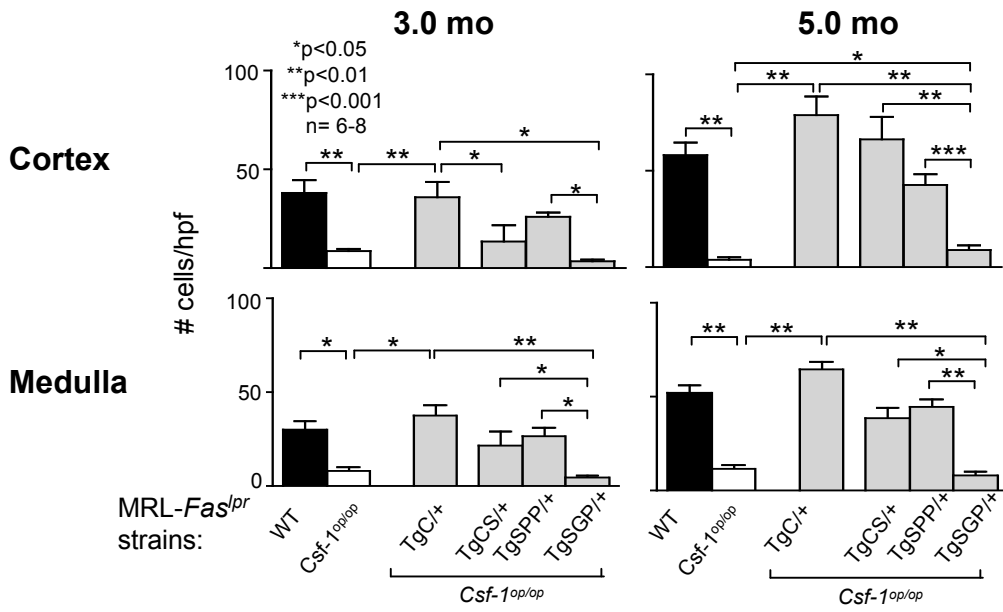

Intra-renal Leukocyte Activation (5 mo)

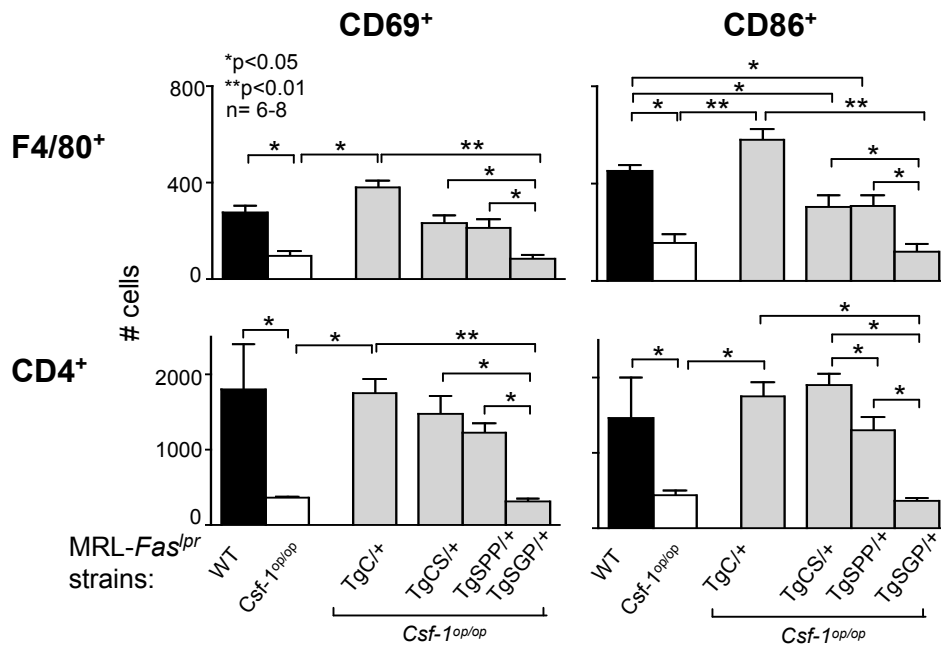

# Phenotype of Monocytes/M $\phi$

# Supplement Fig 5

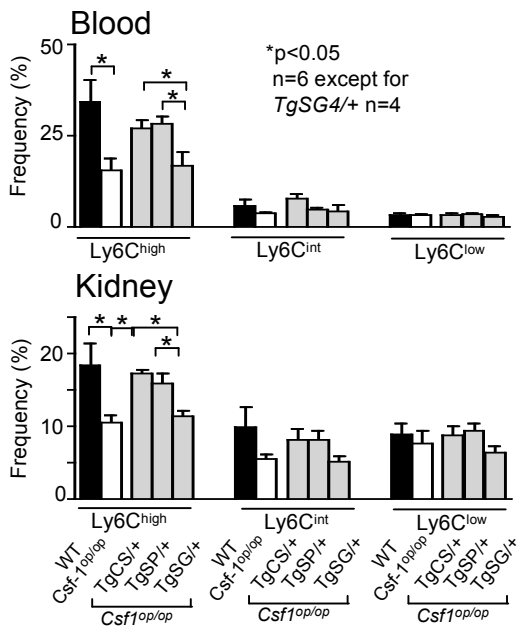

Supplement: supp_ASN.2011010038_Supplemental_Figures_combined.pdf [file supp_ASN.2011010038_Supplemental_Figures_combined.pdf]
